# Supplementary material
Source: publisher figshare collection journal article supplement (https://tandf.figshare.com/ndownloader/files/28102110)
Supplement: Supplementary file 1 [file 28102110]

**Supplementary Table S3**. Sr and Nd isotopes of the Guéra Massif post-collisional granites

| Sample | Age | Rb (ppm) | Sr (ppm) | (87Rb/ 86Sr)m | (87Sr/ 86Sr)m | 2σ | ISr | Sm (ppm) | Nd (ppm) | (147Sm/ 144Nd)m | (143Nd/ 144Nd)m | 2σ | εNd(t) | TDM (Ma) |
| --- | --- | --- | --- | --- | --- | --- | --- | --- | --- | --- | --- | --- | --- | --- |
| 14ZA01 | 570 | 75.2 | 85.2 | 2.557 | 0.724900 | 7 | 0.704119 | 8.8 | 54.3 | 0.0977 | 0.512207 | 6 | -1.2 | 1237 |
| 14ZA10 | 560 | 167 | 42.0 | 11.60 | 0.798993 | 8 | 0.706394 | 7.1 | 37.3 | 0.1152 | 0.511668 | 6 | -13.1 | 2284 |
| 14ZA19B | 560 | 26.5 | 74.34 | 1.034 | 0.740149 | 7 | 0.731891 | 10.5 | 50.7 | 0.1250 | 0.511909 | 6 | -9.1 | 2124 |
| 14ZA20B | 570 | 121 | 68.1 | 5.198 | 0.750972 | 13 | 0.708732 | 19.9 | 118.4 | 0.1016 | 0.511879 | 6 | -7.9 | 1723 |
| 14ZA22A | 570 | 77.3 | 87.7 | 2.553 | 0.726821 | 8 | 0.706071 | 16.7 | 87.5 | 0.1152 | 0.511850 | 6 | -9.5 | 2005 |
| 14ZA22B | 570 | 169 | 6.25 | 84.39 | 1.45586 | 13 | 0.770033 | 12.2 | 54.1 | 0.1360 | 0.512059 | 5 | -6.9 | 2132 |
| 14ZA23 | 570 | 139 | 19.0 | 21.57 | 0.880627 | 21 | 0.705303 | 10.5 | 57.2 | 0.1104 | 0.512021 | 6 | -5.8 | 1663 |
| 14ZA24A | 570 | 112 | 44.1 | 7.440 | 0.763470 | 9 | 0.703003 | 5.8 | 36.7 | 0.0960 | 0.511845 | 5 | -8.1 | 1686 |

m = measured. Rb, Sr, Sm and Nd concentrations were obtained by ICP-MS and the precisions are better than ±2%. ISr = (87Sr/86Sr)m –{[(87Rb/86Sr)m * [(e(Srλ*Age))-1]}; Srλ =1.42*10-11. εNd = {[(143Nd/144Nd)initial/(147Sm/144Nd)CHUR]-1}*10000. TDM = 1/Ndλ* ln[(143Nd/144Nd)m-(143Nd/144Nd)DMtoday /(147Sm/144Nd)m (147Sm/144Nd)DMtoday+1]; Ndλ = 6.54x10-12
